# Supplementary material for: Assessing the burden of dog bites and utilisation of post-exposure prophylaxis in Bengaluru district: A community-based cross-sectional survey and decision-tree modelling study
Source: Research Square preprint supplement (doi:10.21203/rs.3.rs-7181784/v1), 2025-08-06
Supplement: Supplementary file 1 [file e8a58c73688140d443deae3e.docx]

**Annexure 1:**

Participant information Sheet

**Information to the Participant**

Study title: Assessing the Burden of dog Bites and Utilization of Post-Exposure Prophylaxis in Bangalore District: A Community-Based Cross-Sectional Survey and Decision-Tree Modelling Study

Principal investigator: [Darshan R Masters of Public Health candidate, M S Ramaiah University of Allied Health Science]

**Faculty Advisor:**

You are invited to take part in a research study. This form contains information that will help you decide whether to join the study. Taking part in this research project is voluntary. You do not have to participate and you can stop at any time. Please take time to read this entire form and ask questions before deciding whether to take part in this research project.

The purpose of the study is to assess the burden of dog bites and the utilization of post-exposure prophylaxis (PEP) among residents of Bangalore District. This study aims to investigate the incidence of dog bites, the usage of PEP, and the knowledge, attitudes, and practices (KAP) regarding rabies prevention among the local population. By examining the relationship between dog bite incidents and PEP utilization, this research seeks to identify key factors that influence public health outcomes. The ultimate goal is to provide insights that can inform public health initiatives and urban planning strategies aimed at reducing rabies incidents and improving the health and well-being of residents.

People aged between 18-69 years, who can understand English or Kannada and are residents of Bangalore District, can participate in this study. Please note that participants who do not complete the questionnaire fully will be excluded.

The study will be completed in 20-25 minutes. Once all the required questions are completed the study will be completed. Potential risks of participating in this study include information leakage but the personal information that you provide will be coded and the raw data will be only accessed by me and my guide. If needed for statistical analysis, the data will be masked, and only required data will be provided. In case of publishing an article, on this study, this data might be saved in a repository for future reference. If we share your information with

other researchers, it will be de-identified, which means that it will not contain your name or other information that can directly identify you. This research may be like this study or completely different. We will not ask for your additional informed consent for these studies. The data collected will be stored for a minimum of 3 years. You may not receive any personal benefits from being in this study. However, others may benefit from the knowledge gained from this study.

Please contact the researchers for the reasons listed below:

• Obtain more information about the study

• Ask a question about the study procedures

• _Express a concern about the study

**Principal Investigator:**

**Email:** darshan9241@gmail.com

**Phone:** 8310859564

**Data Collection form**

**Socio-Demographic Information**

1. Name: __________________________ (Optional)
2. Age: __________________________
3. Gender:
   ☐ Male [1]
   ☐ Female [2]
   ☐ Other [3]
4. Education Level:
   ☐ No formal education [1]
   ☐ Primary [2]
   ☐ Secondary [3]
   ☐ Higher education [4]
5. Occupation:
   ☐ Employed [1]
   ☐ Unemployed [2]
   ☐ Student [3]
   ☐ Retired [4]
6. Monthly Income:
   ☐ Less than ₹10,000 [1]
   ☐ ₹10,000 - ₹30,000 [2]
   ☐ ₹30,000 - ₹50,000 [3]
   ☐ More than ₹50,000 [4]
7. Marital Status:
   ☐ Single [1]
   ☐ Married [2]
   ☐ Divorced [3]
   ☐ Widowed [4]
8. Residential Area: __________________________

**Dog Bite Incidence**

1. Have you or anyone in your household experienced a dog bite in the last 12 months?
   ☐ Yes [1]
   ☐ No [2]
2. How many people in your household have been bitten by a dog in the last 12 months?
3. Date of the most recent incident: __________________________
4. Where did the incident occur?
   ☐ At home (own pet) [1]
   ☐ At home (neighbour’s pet) [2]
   ☐ Street [3]
   ☐ Public area [4]
   ☐ Workplace [5]
   ☐ Other: __________ [6]
5. What was the severity of the bite?
   ☐ Minor (scratch, no bleeding) [1]
   ☐ Moderate (bleeding but not deep) [2]
   ☐ Severe (deep wound or multiple bites) [3]
6. What did you do immediately after the bite?
   ☐ Washed the wound with soap and water [1]
   ☐ Applied home remedies (turmeric, oil, etc.) [2]
   ☐ Did nothing [3]
   ☐ Sought medical care immediately [4]
7. Did you seek medical attention after the bite?
   ☐ Yes [1]
   ☐ No [2]
8. Where did you seek medical attention? (if yes)
   ☐ Government hospital [1]
   ☐ Private hospital [2]
   ☐ Primary health centre [3]
   ☐ Other (please specify): __________ [4]
9. What was the reason for not seeking medical attention? (if no)

☐ Did not think it was necessary [1]
☐ Lack of access to healthcare [2]
☐ Cost concerns [3]
☐ Lack of awareness about rabies [4]
☐ Other (please specify): __________ [5]

**Utilization of Post-Exposure Prophylaxis (PEP)**

1. Did you receive post-exposure prophylaxis (PEP) after the dog bite?
   ☐ Yes [1]
   ☐ No [2]
2. How long after the bite did you receive the first dose of PEP?
   ☐ Within 24 hours [1]
   ☐ 1–3 days later [2]
   ☐ More than 3 days later [3]
3. How many doses did you receive?
   ☐ 1 [1]
   ☐ 2 [2]
   ☐ 3 [3]
   ☐ 4 or more [4]
4. Did you complete the full course of PEP?
   ☐ Yes [1]
   ☐ No [2]
5. If no, why did you not complete the full PEP regimen?
   ☐ High cost [1]
   ☐ Felt better after initial doses [2]
   ☐ Advised by healthcare provider to stop [3]
   ☐ Side effects of vaccine [4]
   ☐ Forgot to return for remaining doses [5]
   ☐ Other: __________ [6]
6. Did you receive Rabies Immunoglobulin (RIG) along with PEP?
   ☐ Yes [1]
   ☐ No [2]
   ☐ Don't know [3]

**Dog Condition After the Bite**

1. What happened to the dog that bit you after the bite?
   ☐ The dog was observed for at least 10 days and remained healthy (No rabies symptoms) [1]
   ☐ The dog was observed for at least 10 days and developed signs of rabies (e.g., excessive drooling, aggression, paralysis, abnormal behavior) [2]
   ☐ The dog died or disappeared within 10 days after the bite [3]
   ☐ The dog was caught and tested for rabies, but I don’t know the result [4]
   ☐ The dog was caught and tested for rabies, and the result was positive [5]
   ☐ The dog was caught and tested for rabies, and the result was negative [6]
   ☐ I don’t know what happened to the dog [7]

**Knowledge, Attitudes, and Practices (KAP) Regarding Rabies**

1. How would you rate your knowledge about rabies?
   ☐ Poor [1]
   ☐ Fair [2]
   ☐ Good [3]
   ☐ Excellent [4]
2. What are the modes of transmission of rabies?
   ☐ Bites from infected animals [1]
   ☐ Contact with saliva from an infected animal [2]
   ☐ Airborne transmission [3]
   ☐ Other: __________ [4]
3. Is rabies preventable?
   ☐ Yes [1]
   ☐ No [2]

**Perceived Impact of Dog Bites and PEP**

1. Do you believe that receiving PEP after a dog bite is important for preventing rabies?
   ☐ Very important [1]
   ☐ Moderately important [2]
   ☐ Slightly important [3]
   ☐ Not important at all [4]
2. In the last month, how often have you felt anxious about the possibility of rabies after a dog bite?
   ☐ Never [1]
   ☐ Rarely [2]
   ☐ Sometimes [3]
   ☐ Often [4]
   ☐ Always [5]

**Barriers to Accessing PEP**

1. Do you feel safe seeking medical help for dog bites in your community?
   ☐ Yes [1]
   ☐ No [2]
   ☐ Unsure [3]
2. What makes you feel unsafe or unsure about seeking medical help?
   ☐ Lack of nearby healthcare facilities [1]
   ☐ Fear of inadequate treatment [2]
   ☐ Concern about costs [3]
   ☐ Previous negative experience [4]
   ☐ Other (please specify): __________ [5]

**Additional Information**

1. Do you personally know anyone in your community who has died from rabies?
   ☐ Yes [1]
   ☐ No [2]
2. Please share any additional comments or concerns regarding dog bites or rabies prevention

**Annexure 2: STROBE Checklist for Cross-Sectional Study**

| **STROBE Section** | **Item No.** | **Recommendation** | **Page No.** | **Relevant text from manuscript** |
| --- | --- | --- | --- | --- |
| **Title and abstract** | 1(a) | Indicate the study’s design with a commonly used term in the title or the abstract | Title page, Pg. 1 | Title: “Assessing the Burden of Dog Bites and Utilization of Post-Exposure Prophylaxis in Bangalore District: A Community-Based Cross-Sectional Survey and Decision-Tree Modelling Study.” |
|  | 1(b) | Provide in the abstract an informative and balanced summary of what was done and what was found | Pg. 1 | The abstract summarizes objectives, design, sampling, results (dog bite incidence, PEP coverage), and modelling estimates of rabies deaths. |
| **Introduction** |  |  |  |  |
| Background/rationale | 2 | Explain the scientific background and rationale for the investigation being reported | Pg. 2 | High urban rabies burden; gaps in local data on dog bites and PEP; need for evidence-based planning at district level using a combined survey and model approach. |
| Objectives | 3 | State specific objectives, including any prespecified hypotheses | Pg. 2 | Objectives: Estimate incidence of dog bites, assess PEP utilization, and estimate rabies mortality probability using decision-tree modelling. |
| **Methods** |  |  |  |  |
| Study design | 4 | Present key elements of study design early in the paper | Pg. 3 | Community-based cross-sectional survey with decision-analytic modelling using primary and secondary data. |
| Setting | 5 | Describe the setting, locations, and relevant dates, including periods of recruitment, exposure, follow-up, and data collection | Pg. 3-4 | Study conducted in 8 BBMP zones of Bengaluru from December 2024 to April 2025. |
| Participants | 6(a) | Give the eligibility criteria, and the sources and methods of selection of participants | Pg. 3-4 | Adults ≥18 years; multistage stratified cluster sampling of 420 households across 30 wards. |
| Variables | 7 | Clearly define all outcomes, exposures, predictors, potential confounders, and effect modifiers. Give diagnostic criteria, if applicable | Pg. 3-4 | Outcomes: dog bite incidence, PEP uptake, PEP completion, rabies mortality (modelled); predictors: demographics, access, knowledge. |
| Data sources/ measurement | 8* | For each variable of interest, give sources of data and details of methods of assessment (measurement) | Pg. 3-4 | Structured interviews with pre-validated tool; collected KAP, bite history, PEP status; consistent tool used across all zones. |
| Bias | 9 | Describe any efforts to address potential sources of bias | Pg. 3-4 | Multistage sampling, short recall period (12 months), pre-tested tools, interviewer training to reduce recall and information bias. |
| Study size | 10 | Explain how the study size was arrived at | Pg. 3-4 | Sample size (420) based on dog bite incidence (1.7%) with 95% CI, design effect of 2, 15% non-response. |
| Quantitative variables | 11 | Explain how quantitative variables were handled in the analyses | Pg. 3-4 | Categorical variables analysed using proportions/chi-square; continuous variables (age) with means/t-tests. |
| Statistical methods | 12(a) | Describe all statistical methods, including those used to control for confounding | Pg. 3-4 | Chi-square, t-test, ANOVA, and multivariable regression used in R; confounders controlled in modelling. |
|  | 12(b) | Describe any methods used to examine subgroups and interactions | Pg. 3-4 | Analyses stratified by age, income, education; regression models adjusted accordingly. |
|  | 12(c) | Explain how missing data were addressed | Pg. 3-4 | Missing data were minimized through cleaning. Imputation used where suitable; cases with major missing values excluded. |
|  | 12(d) | Describe analytical methods taking account of sampling strategy | Pg. 3-4 | Multistage cluster sampling accounted for using design-adjusted analysis and proportional selection. |
|  | 12(e) | Describe any sensitivity analyses | Pg. 3-4 | Sensitivity analysis assessed model robustness under different PEP assumptions and missing data scenarios. |
| **Results** |  |  |  |  |
| Participants | 13(a) | Report numbers of individuals at each stage of study | Pg. 5, Pg. 14 | 420 households surveyed; full response achieved. |
|  | 13(b) | Give reasons for non-participation at each stage | Pg. 5 | Households unwilling or unavailable were replaced using pre-defined criteria. |
|  | 13(c) | Consider use of a flow diagram | Pg. 5 | Figure II shows the participant flow. |
|  | 14(a) | Give characteristics of study participants and information on exposures and potential confounders | Pg. 6 | Table 1 provides age, gender, income, education, occupation, and marital status of respondents. |
| Descriptive data | 14(b) | Indicate number of participants with missing data for each variable of interest | Pg. 6 | Missing data minimal; excluded from analysis if critical or imputed for non-critical fields. |
|  | 15* | Report numbers of outcome events or summary measures | Pg. 6 | 9% annual bite incidence; 92.1% received ARV; 42.1% received RIG (among Category III bites). |
| Outcome data | 16(a) | Give unadjusted and confounder-adjusted estimates and their precision | Pg. 5-14 | Multivariable regression results with ORs, 95% CI; no significant predictors found for dog bites. |
| Main results | 16(b) | Report category boundaries when continuous variables were categorized | Pg. 5-14 | Income, education, and occupation categorized and tabulated. |
|  | 16(c) | Translate relative risk into absolute risk if relevant | Pg. 5-14 | Decision-tree modelling estimates 1.17 rabies deaths/year under current PEP coverage. |
| Other analysis | 17 | Report other analyses done | Pg. 5 Pg. 14 | Subgroup trends reported; model sensitivity tested for PEP access scenarios. |
| Key results | 18 | Summarise key results with reference to study objectives | Pg. 5–14 | Despite high PEP initiation, low RIG use and wound washing lead to preventable risk; modelling shows deaths persist. |
| Limitations | 19 | Discuss limitations of the study | Pg. 5-14 | Cross-sectional nature, potential recall bias, assumptions in model; small dog bite sample limits generalizability. |
| Interpretation | 20 | Give a cautious overall interpretation of results | Pg. 5-14 | PEP gaps persist; model offers actionable local estimate; calls for targeted outreach and improved PEP completion. |
| Generalisability | 21 | Discuss the generalisability of the study results | Pg. 5-14 | Applicable to Bengaluru; Karnataka limited for other states. |
| **Other Information** |  |  |  |  |
| **Funding** | 22 | Give the source of funding and the role of the funders | Pg. 14 | No external funding received. |
